# Supplementary material for: Very small mobile repeated elements in cyanobacterial genomes
Source: HighWire-hosted journal article supplement (doi:10.1101/gr.074336.107), 2008-07-03
Supplement: SDR-Suppl-File-09-logos.pdf [file SDR-Suppl-File-09-logos.pdf]

Supplemental Figure 9: Sequence Logos of SDR Elements

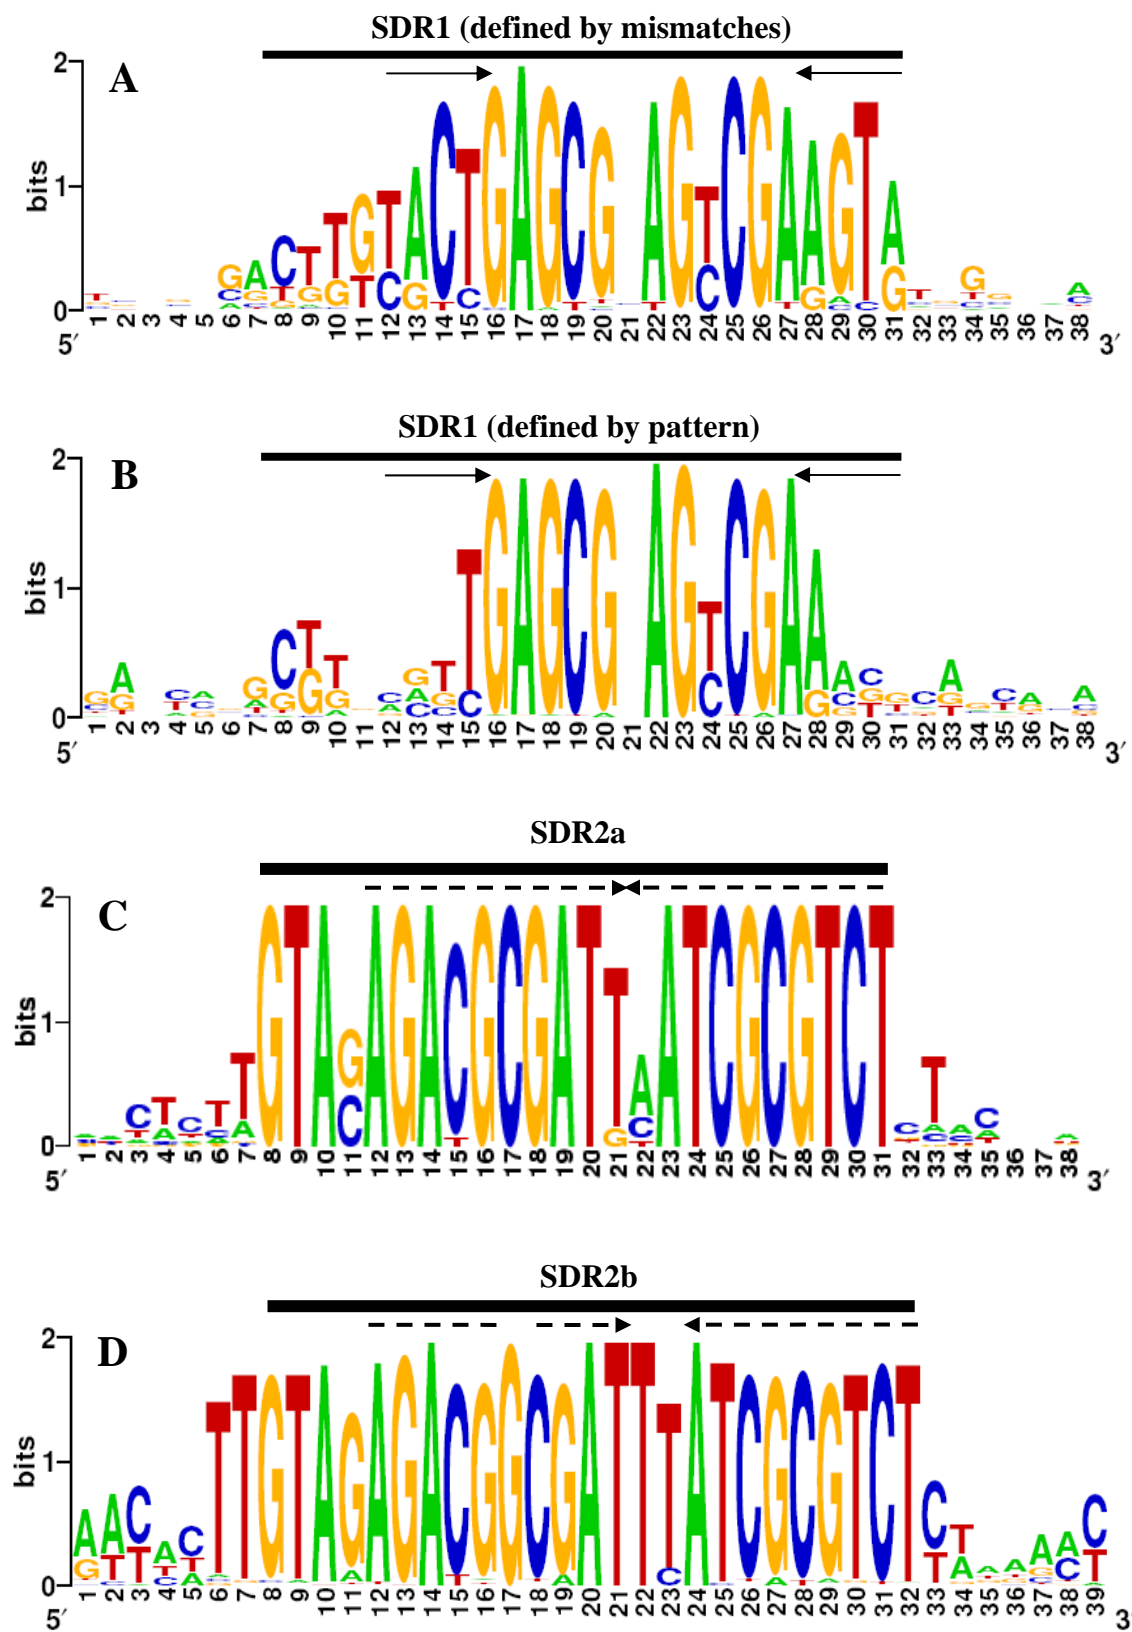

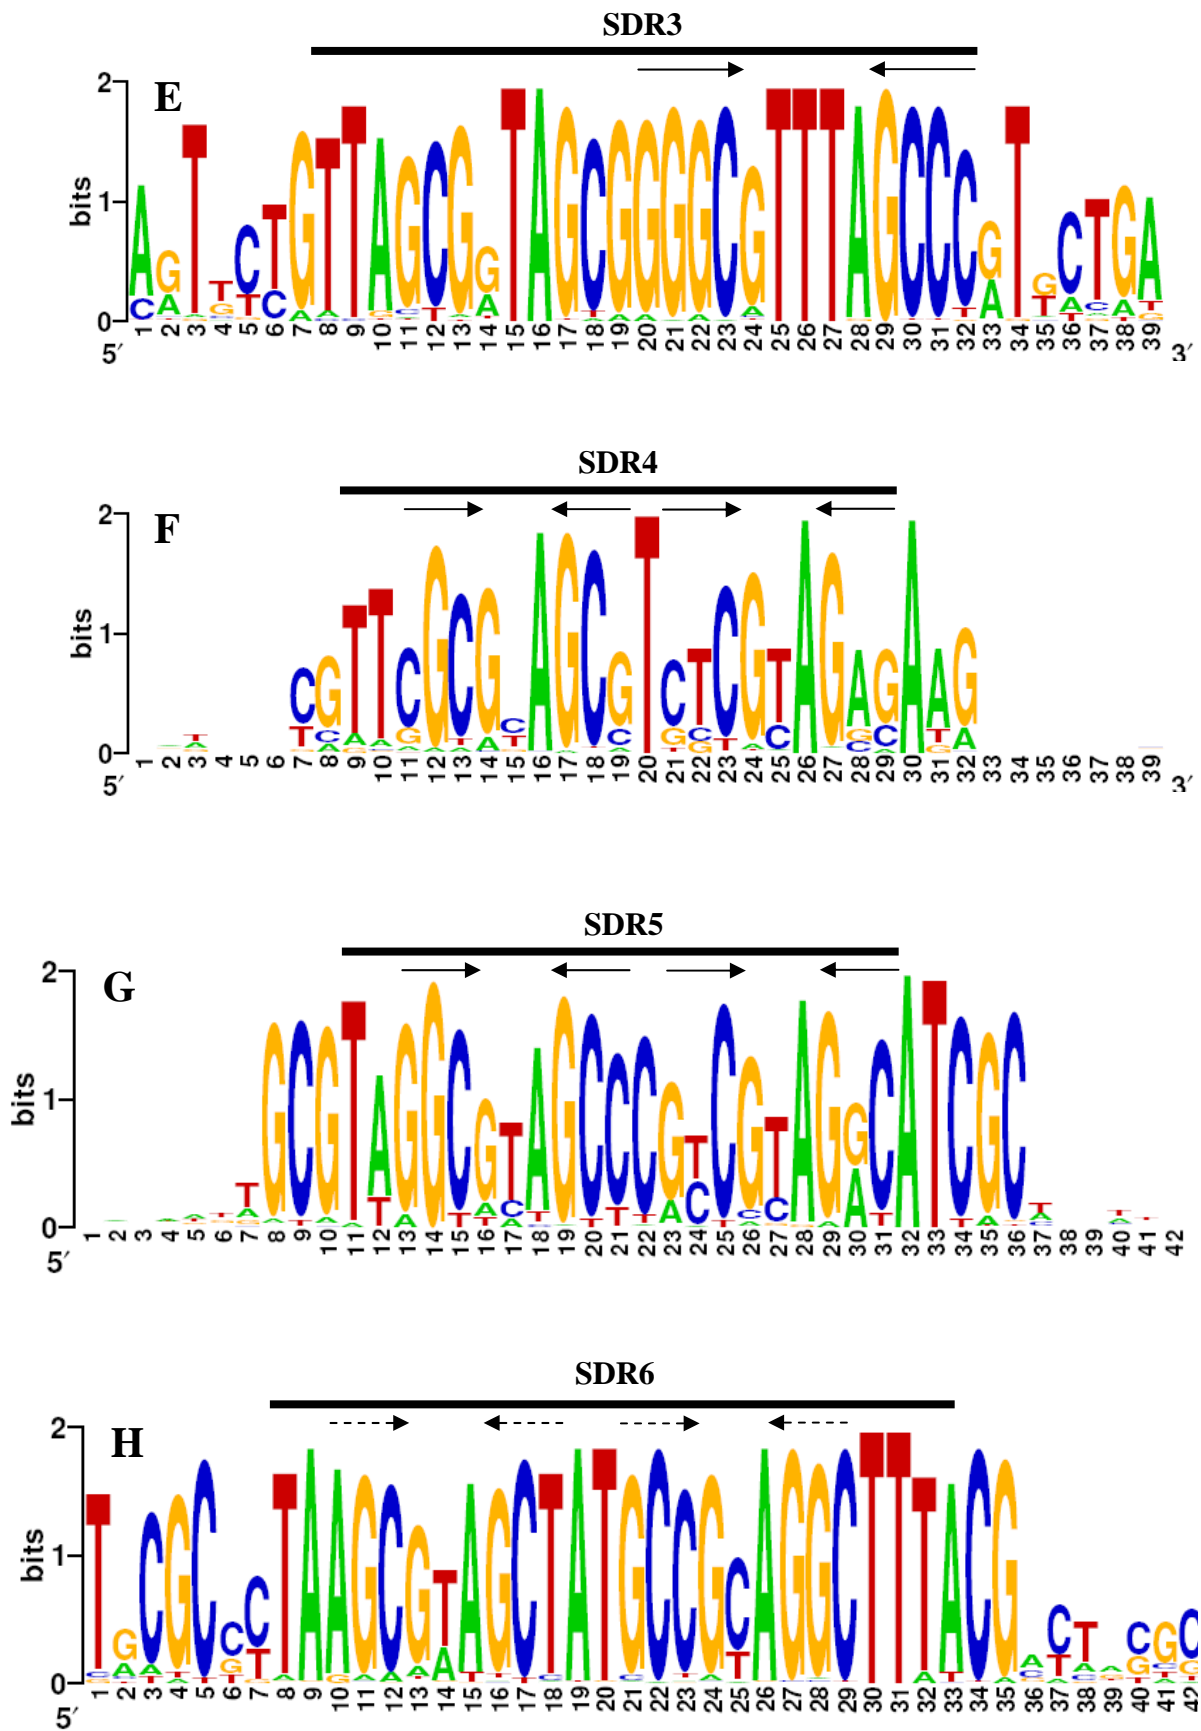

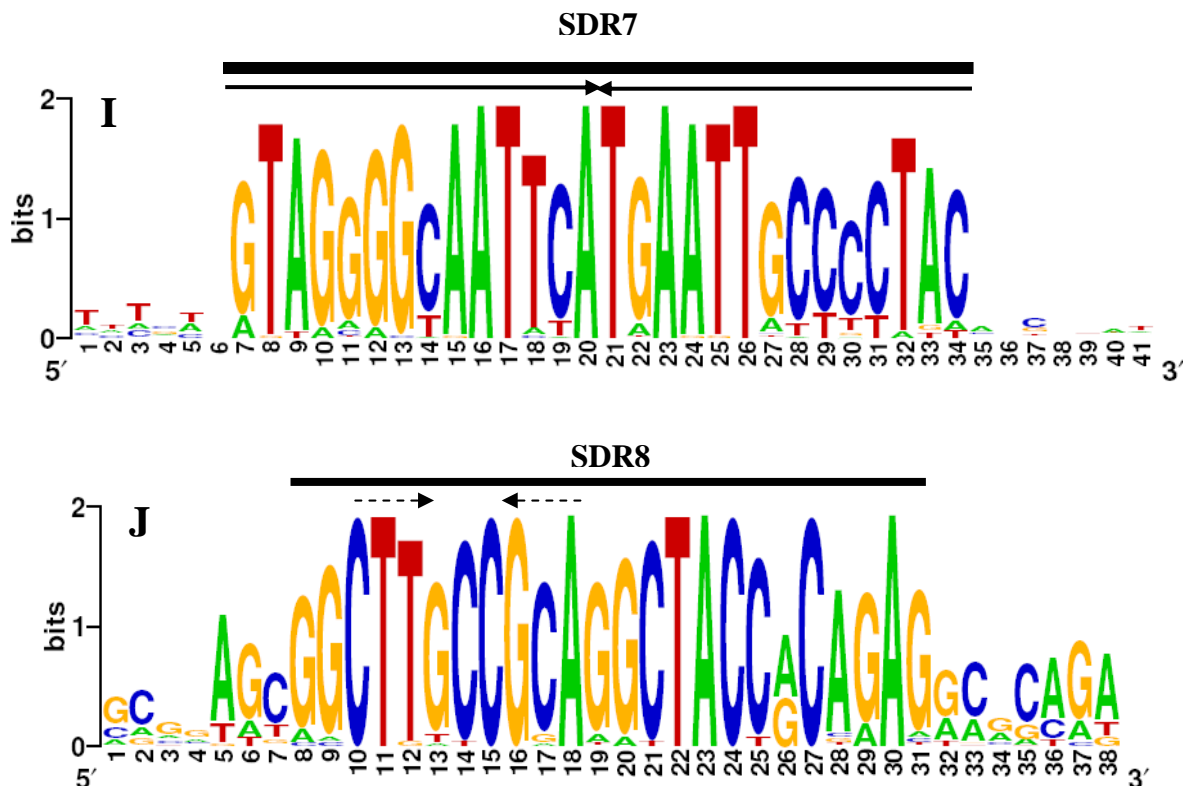

**Supplemental Figure 9: Sequence Logos of SDR elements.** Each sequence logo provides a view of the information at each position of an SDR element and its flanking sequence. The thick bar indicates the extent of the SDR element. The absolute height of each stack of letters is equal to the information content at that position in the alignment. The relative height of each letter is proportional to the relative frequency of the nucleotide at that position. Arrows are shown at positions of potential base-pairing. The arrows have solid lines where the pairing is supported by compensatory mutations. Otherwise they have dotted lines. All SDR elements were used in the alignments except those in which it is evident that the element has been interrupted by another sequence.
